# Supplementary material
Source: HighWire-hosted journal article supplement (https://bmjopen.bmj.com/content/12/4/e060900)
Supplement: inline-supplementary-material-1 [file inline-supplementary-material-1.pdf]

## Medline search strategy:

| Search | Query                                                                                                                                                                                                                                                                                   |
|--------|-----------------------------------------------------------------------------------------------------------------------------------------------------------------------------------------------------------------------------------------------------------------------------------------|
| #1     | "Lung Neoplasms"[MeSH Terms]                                                                                                                                                                                                                                                            |
| #2     | "carcinoma, non small cell lung"[MeSH Terms]                                                                                                                                                                                                                                            |
| #3     | (((((NSCLC[Title/Abstract]) OR (lung cancer*[Title/Abstract])) OR (lung carcinom*[Title/Abstract])) OR (lung neoplasm*[Title/Abstract])) OR (lung tumor*[Title/Abstract])) OR (lung tumour*[Title/Abstract])) OR (non small cell*[Title/Abstract])) OR (nonsmall cell*[Title/Abstract]) |
| #4     | #1 OR #2 OR #3                                                                                                                                                                                                                                                                          |
| #5     | "Chemoradiotherapy"[MeSH Terms]                                                                                                                                                                                                                                                         |
| #6     | ((chemoradiotherap*[Title/Abstract]) OR (radiochemotherap*[Title/Abstract])) OR (CCRT[Title/Abstract])                                                                                                                                                                                  |
| #7     | #5 OR #6                                                                                                                                                                                                                                                                                |
| #8     | "Radiotherapy"[MeSH Terms]                                                                                                                                                                                                                                                              |
| #9     | ((radiotherap*[Title/Abstract]) OR (radiation therap*[Title/Abstract])) OR (radiation treatment*[Title/Abstract])                                                                                                                                                                       |
| #10    | #8 OR #9                                                                                                                                                                                                                                                                                |
| #11    | ("Antineoplastic Combined Chemotherapy Protocols"[Mesh] OR "Antineoplastic Agents"[Mesh] OR "Chemotherapy, Adjuvant"[Mesh] OR "Induction Chemotherapy"[Mesh]) OR "Combined Modality Therapy"[Mesh]                                                                                      |
| #12    | "chemotherap*"[Title/Abstract]                                                                                                                                                                                                                                                          |
| #13    | #11 OR #12                                                                                                                                                                                                                                                                              |
| #14    | #10 AND #13                                                                                                                                                                                                                                                                             |
| #15    | #7 OR #14                                                                                                                                                                                                                                                                               |
| #16    | "Consolidation Chemotherapy"[MeSH Terms]                                                                                                                                                                                                                                                |
| #17    | "Maintenance Chemotherapy"[MeSH Terms]                                                                                                                                                                                                                                                  |
| #18    | ((((prolonged[Title/Abstract]) OR (duration[Title/Abstract])) OR (continu*[Title/Abstract])) OR (consolidation[Title/Abstract])) OR (maintenance[Title/Abstract])                                                                                                                       |
| #19    | #16 OR #17 OR #18                                                                                                                                                                                                                                                                       |
| #20    | "Randomized Controlled Trial"[Publication Type]                                                                                                                                                                                                                                         |
| #21    | (((((randomized[Title/Abstract]) OR (placebo[Title/Abstract])) OR (random*[Title/Abstract])) OR (trial[Title/Abstract])) OR (groups[Title/Abstract])                                                                                                                                    |
| #22    | #20 OR #21                                                                                                                                                                                                                                                                              |
| #23    | #4 AND #15 AND #19 AND #22                                                                                                                                                                                                                                                              |
